# Supplementary material for: Geometry-Aware Abdominal Aortic Aneurysm Digital Twin for Patient-Specific Wall Stress Mapping
Source: Research Square preprint supplement (doi:10.21203/rs.3.rs-9971735/v1), 2026-07-03
Supplement: Supplementary file 1 [file b5fda95c23aa9496e6755764.pdf]

# Supplementary Material: Geometry-Aware Abdominal Aortic Aneurysm Digital Twin for Patient-Specific Wall Stress Mapping

Julian Carvajal Rico<sup>1</sup>, Victor De Oliveira<sup>2</sup>, Satish C. Muluk<sup>3</sup>, Mark K. Eskandari<sup>4</sup>, Vikram S. Kashyap<sup>5</sup>, and Ender A. Finol<sup>1,\*</sup>

<sup>1</sup>Department of Mechanical, Aerospace, and Industrial Engineering, The University of Texas at San Antonio, San Antonio, TX 78249, USA

<sup>2</sup>Department of Statistics and Data Science, The University of Texas at San Antonio, San Antonio, TX 78249, USA

<sup>3</sup>Department of Thoracic and Cardiovascular Surgery, Allegheny Health Network, Allegheny General Hospital, Pittsburgh, PA 15212, USA

<sup>4</sup>Feinberg School of Medicine, Northwestern University, Chicago, IL 60611, USA

<sup>5</sup>Cardiovascular Health, Corewell Health, Grand Rapids, MI 49503, USA

\*Corresponding Author: ender.finol@utsa.edu

## Appendix

This supplementary material provides additional implementation details to support reproducibility of the reported numerical experiments. It includes the full set of training hyperparameters, hardware configuration, and explicit pseudo-code for each GNN architecture used for AAA wall stress prediction.

## A Pseudo-codes for the GNN models

This section provides step-by-step pseudo-code for the three GNN architectures (GGCN, EGNN, and the local GT) used in this study, including data pre-processing, training, and evaluation loops.

### A.1 Gated Graph Convolution Network (GGCN)

**Algorithm 1** Training residual GGCN for AAA wall stress prediction

**Require:** Dataset of graphs  $\{G_m\}_{m=1}^M$  with node features  $x$ , positions  $pos$ , graph attributes  $g$ , and FEA stresses  $y_{FEA}$ .

- 1: Convert all edge indices to undirected.
- 2: For each graph  $G_m$ , add stress-based node weights  $w$  using local stress quantiles (50/80/95%).
- 3: Compute graph-level targets: mean stress and  $p99$  stress; build stratified  $K$ -fold splits using quantile bins of (mean,  $p99$ ) and ILT class.
- 4: **for** each fold  $f = 1, \dots, K$  **do**
  - 5: Split graphs into train and test indices based on stratified folds.
  - 6: Compute feature scalars on train graphs: means and stds for  $x$ ,  $y_{FEA}$ ,  $g$ , and  $pos$ .
  - 7: Construct train and test datasets:  
For each sampled graph, optionally apply graph-level augmentation to  $g$  and selected  $x$ , and optional stress-stratified node subsampling (3 bins in stress).  
Normalize  $x$ ,  $g$ ,  $pos$  with train scalars; normalize  $y_{FEA}$  to  $y$ .  
Concatenate normalized  $x$ , broadcast  $g$ , and  $pos$  into final node feature  $h$ .
  - 8: Initialize residual GGCN:  
Input linear layer:  $h \rightarrow \mathbb{R}^{d_{hid}}$ .  
 $L$  GatedGraphConv layers with LayerNorm, ReLU, dropout, and residual connections.  
Output linear layer:  $\mathbb{R}^{d_{hid}} \rightarrow \mathbb{R}$  (node-specific stress).
  - 9: Initialize Adam optimizer and ReduceLROnPlateau scheduler; set best loss =  $\infty$ .
  - 10: **for** epoch = 1,  $\dots$ , max\_epochs **do**
    - 11: **Training loop:**
    - 12: **for** each batch of graphs **do**
      - 13: Forward pass:  $\hat{y} = \text{GGCN}(h, \text{edge\_index})$  (normalized stresses).
      - 14: Node-specific loss:  $L_{\text{node}} = \mathbb{E}[w \cdot (\hat{y} - y)^2]$ .
      - 15: Mean-stress loss:  $L_{\text{mean}} = (\text{mean}(\hat{y}) - \text{mean}(y))^2$ .
      - 16: Approximate  $p99$  of  $y$  and  $\hat{y}$  using top- $k$  averaging; define  $L_{p99} = (p99(\hat{y}) - p99(y))^2$ .
      - 17: Pinball loss at  $q = 0.99$ :  $L_{\text{pin}} = \mathbb{E}[\max(q(y - \hat{y}), (q - 1)(y - \hat{y}))]$ .
      - 18: Total loss:  $L = L_{\text{node}} + \lambda_{\text{mean}}L_{\text{mean}} + \lambda_{p99}L_{p99} + \lambda_{\text{pin}}L_{\text{pin}}$ .
      - 19: Backpropagate and update model parameters with Adam.

```

48 20:     end for
49 21:     Update learning-rate scheduler using training loss.
50 22:     Apply early stopping if training loss has not improved for a fixed patience.
51 23: end for
52 24: Save best-performing model.
53 25: Evaluate on train and test loaders:
54     De-normalize predictions.
55     Report node-specific MSE, RE, and  $R^2$ .
56     Report graph-level RE for mean stress and  $p99$  stress.
57 26: end for

```

## 58 A.2 Equivariant Graph Neural Network (EGNN)

59 **Algorithm 2** Training residual EGNN for AAA wall stress prediction

60 **Require:** Dataset of graphs  $\{G_m\}_{m=1}^M$  with node features  $x$ , positions  $pos$ , graph attributes  $g$ , and FEA stresses  $y_{\text{FEA}}$ .

```

61 1: Convert all edge indices to undirected.
62 2: For each graph  $G_m$ , add stress-based node weights  $w$  using local stress quantiles (50/80/95%).
63 3: Compute graph-level targets: mean stress and  $p99$  stress; build stratified  $K$ -fold splits using quantile bins of (mean,  $p99$ )
64     and ILT class.
65 4: for each fold  $f = 1, \dots, K$  do
66 5:   Split graphs into train and test indices based on stratified folds.
67 6:   Compute feature scalars on train graphs: means and stds for  $x$ ,  $y_{\text{FEA}}$ ,  $g$ , and  $pos$ .
68 7:   Construct train and test datasets:
69       Normalize  $x$ ,  $g$ ,  $pos$  with train scalars; normalize  $y_{\text{FEA}}$  to  $y$ .
70       Concatenate normalized  $x$ , broadcast  $g$ , and  $pos$  into final node feature  $h$ .
71 8:   Initialize residual EGNN:
72       Input linear layer:  $h \rightarrow \mathbb{R}^{d_{\text{hid}}}$ .
73       For each layer and edge  $i \leftarrow j$ :

```

$$\Delta x_{ij} = x_i - x_j, d_{ij}^2 = \|\Delta x_{ij}\|^2.$$

$$m_{ij} = \phi_e(h_i, h_j, d_{ij}^2).$$

$$\text{Aggregate } m_i = \sum_j m_{ij}.$$

$$h_i^{\text{new}} = \phi_h(h_i, m_i).$$

$$c_{ij} = \phi_x(m_{ij}), \Delta x_i = \sum_j c_{ij} \Delta x_{ij}.$$

$$x_i^{\text{new}} = x_i + \Delta x_i.$$

```

74
75
76
77
78
79
80 Apply LayerNorm, ReLU, dropout, and residual skips.
81 Output linear layer maps hidden features to node-specific normalized stress.
82 9: for epoch = 1, ..., max_epochs do
83 10:   for each batch of graphs do
84 11:     Forward pass:  $\hat{y} = \text{EGNN}(h, \text{edge\_index}, pos)$ .
85 12:     Compute  $L_{\text{node}}$ ,  $L_{\text{mean}}$ ,  $L_{p99}$ , and  $L_{\text{pin}}$  as in Algorithm 1.
86 13:     Backpropagate and update parameters with Adam.
87 14:   end for
88 15:   Update scheduler and apply early stopping.
89 16: end for
90 17: Save best-performing model and evaluate de-normalized node- and graph-level errors.
91 18: end for

```

## 92 A.3 Graph Transformer (GT)

93 **Algorithm 3** Training local Graph Transformer for AAA wall stress prediction

94 **Require:** Dataset of graphs  $\{G_m\}_{m=1}^M$  with node features  $x$ , positions  $pos$ , graph attributes  $g$ , and FEA stresses  $y_{\text{FEA}}$ .

```

95 1: Convert all edge indices to undirected.
96 2: Add stress-based node weights  $w$  using local stress quantiles.
97 3: Build stratified  $K$ -fold splits using graph-level stress summaries and ILT class.
98 4: for each fold  $f = 1, \dots, K$  do
99 5:   Split graphs into train and test indices.
100 6:   Compute train-only scalars for  $x$ ,  $y_{\text{FEA}}$ ,  $g$ , and  $pos$ .

```

```

101 7: Construct train and test datasets with normalization, augmentation, and stress-stratified node subsampling.
102 8: Concatenate normalized node features, broadcast graph attributes, and coordinates into  $h$ .
103 9: Initialize local Graph Transformer:
104     Input linear layer:  $h \rightarrow \mathbb{R}^{d_{\text{hid}}}$ .
105      $L$  local multi-head self-attention layers restricted to graph connectivity.
106     LayerNorm, ReLU, dropout, and residual connections after each attention block.
107     Output linear layer maps hidden features to node-specific normalized stress.
108 10: for epoch = 1, ..., max_epochs do
109 11:     for each batch of graphs do
110 12:         Forward pass:  $\hat{y} = \text{GT}(h, \text{edge\_index})$ .
111 13:         Compute weighted node-specific MSE.
112 14:         Compute mean-stress penalty,  $p99$  penalty, and  $q = 0.99$  pinball loss.
113 15:         Combine loss terms and update parameters with Adam.
114 16:     end for
115 17:     Update ReduceLRonPlateau scheduler and apply early stopping.
116 18: end for
117 19: Save best-performing model and evaluate de-normalized node- and graph-level errors.
118 20: end for

```

## 119 B Training Hyperparameters and Hardware Configuration

**Table B1.** Training hyperparameters and hardware configuration used for the GNN wall stress prediction experiments.

| Model | Hidden dim. | Layers | Dropout | Batch size | Learning rate      |
|-------|-------------|--------|---------|------------|--------------------|
| GGCN  | 128         | 7      | 0.25    | 2          | $1 \times 10^{-3}$ |
| EGNN  | 128         | 7      | 0.25    | 2          | $1 \times 10^{-3}$ |
| GT    | 128         | 6      | 0.25    | 2          | $1 \times 10^{-3}$ |

  

| Optimizer | Weight decay       | Loss                 | $q$  | $\lambda_{\text{mean}}$ | $\lambda_{p99}$ |
|-----------|--------------------|----------------------|------|-------------------------|-----------------|
| Adam      | $1 \times 10^{-5}$ | Tail-aware composite | 0.99 | 1.0                     | 1.0             |

| Random seed | Folds | Max epochs | Scheduler         | Early stopping patience | Augmentation        | Subsampling     |
|-------------|-------|------------|-------------------|-------------------------|---------------------|-----------------|
| 11          | 5     | 1500       | ReduceLRonPlateau | 50 epochs               | Yes (strength 0.08) | Yes (ratio 0.5) |

| Hardware | GPU                               | CPU                     | RAM    |
|----------|-----------------------------------|-------------------------|--------|
| ARC UTSA | Tesla V100S-PCIE-32GB (CUDA 12.3) | $2 \times 20$ -core CPU | 384 GB |
